# Supplementary material for: Association of Implementing an Incentive Metric in the Oregon Medicaid Program With Effective Contraceptive Use
Source: PubMed Central journal article supplement (PMC7407076; doi:10.1001/jamanetworkopen.2020.12540), 2020-08-05

## Supplementary Online Content

Rodriguez MI, Meath T, Huang J, Darney BG, McConnell KJ. Association of implementing an incentive metric in the Oregon Medicaid program with effective contraceptive use. *JAMA Network Open*. 2020;3(8):e2012540. doi:10.1001/jamanetworkopen.2020.12540

**eTable 1.** Estimated Percentage Point Change in Effective Contraception Rates Associated With the Policy by Year From Model Allowing for a Non-Linear Policy Effect

**eTable 2.** Estimated Percentage Point Change in Effective Contraception Rates Associated With the Policy by Year From Model Without Control Group (Standard ITS)

**eTable 3.** Raw Model Output From Primary Comparative Interrupted Time Series Model for Women of All Ages (18-50)

**eTable 4.** Raw Model Output From Primary Comparative Interrupted Time Series Model for Women Ages 18-24

**eTable 5.** Raw Model Output From Primary Comparative Interrupted Time Series Model for Women Ages 25-29

**eTable 6.** Raw Model Output From Primary Comparative Interrupted Time Series Model for Women Ages 30-34

**eTable 7.** Raw Model Output From Primary Comparative Interrupted Time Series Model for Women Ages 35-50

**eFigure.** CONSORT Diagram of Sample Selection

This supplementary material has been provided by the authors to give readers additional information about their work.

**eTable 1.** Estimated Percentage Point Change in Effective Contraception Rates Associated With the Policy by Year From Model Allowing for a Non-Linear Policy Effect

|                         | Policy effect by year |         |                     |         |                      |         |
|-------------------------|-----------------------|---------|---------------------|---------|----------------------|---------|
|                         | Year 2015             |         | Year 2016           |         | Year 2017            |         |
|                         | Estimate (95% CI)     | p-value | Estimates (95%)     | P-value | Estimates (95%)      | P-value |
| <b>Age Group</b>        |                       |         |                     |         |                      |         |
| <b>All Ages (18-50)</b> | 3.6% (0.031, 0.041)   | < 0.01  | 7.6% (0.068, 0.083) | < 0.01  | 11.4% (0.105, 0.124) | < 0.01  |
| <b>18-24</b>            | 3.7% (0.026, 0.048)   | < 0.01  | 9.9% (0.083, 0.115) | < 0.01  | 16.5% (0.144, 0.186) | < 0.01  |
| <b>25-29</b>            | 2.9% (0.013, 0.045)   | < 0.01  | 6.5% (0.042, 0.087) | < 0.01  | 9.3% (0.064, 0.122)  | < 0.01  |
| <b>30-34</b>            | 4.8% (0.033, 0.063)   | < 0.01  | 8.7% (0.067, 0.108) | < 0.01  | 12.2% (0.095, 0.149) | < 0.01  |
| <b>35-50</b>            | 3.5% (0.028, 0.042)   | < 0.01  | 7.1% (0.061, 0.081) | < 0.01  | 9.7% (0.084, 0.110)  | < 0.01  |

**eTable 2.** Estimated Percentage Point Change in Effective Contraception Rates Associated With the Policy by Year From Model Without Control Group (Standard ITS)

|                         | Policy effect by year |         |                     |         |                      |         |
|-------------------------|-----------------------|---------|---------------------|---------|----------------------|---------|
|                         | Year 2015             |         | Year 2016           |         | Year 2017            |         |
|                         | Estimate (95% CI)     | p-value | Estimates (95%)     | P-value | Estimates (95%)      | P-value |
| <b>Age Group</b>        |                       |         |                     |         |                      |         |
| <b>All Ages (18-50)</b> | 2.9% (0.025, 0.033)   | < 0.01  | 6.1% (0.055, 0.067) | < 0.01  | 9.2% (0.084, 0.100)  | < 0.01  |
| <b>18-24</b>            | 3.7% (0.028, 0.046)   | < 0.01  | 8.6% (0.074, 0.098) | < 0.01  | 13.5% (0.118, 0.151) | < 0.01  |
| <b>25-29</b>            | 2.1% (0.009, 0.032)   | < 0.01  | 4.0% (0.024, 0.056) | < 0.01  | 5.9% (0.037, 0.081)  | < 0.01  |
| <b>30-34</b>            | 2.5% (0.014, 0.037)   | < 0.01  | 4.7% (0.031, 0.062) | < 0.01  | 6.8% (0.047, 0.089)  | < 0.01  |
| <b>35-50</b>            | 3.1% (0.025, 0.037)   | < 0.01  | 6.1% (0.053, 0.069) | < 0.01  | 9.1% (0.080, 0.103)  | < 0.01  |

**eTable 3.** Raw Model Output From Primary Comparative Interrupted Time Series Model for Women of All Ages (18-50)

|               | Estimate | Std. Error | t value  | Pr(> t ) |
|---------------|----------|------------|----------|----------|
| (Intercept)   | 0.431491 | 0.001402   | 307.6979 | 0        |
| medicaid      | 0.027658 | 0.002916   | 9.484393 | 2.44E-21 |
| year2         | 0.015589 | 0.000965   | 16.15591 | 1.03E-58 |
| year3         | 0.023528 | 0.001206   | 19.50187 | 1.06E-84 |
| year4         | 0.02932  | 0.00127    | 23.09448 | 5.3E-118 |
| year5         | 0.031139 | 0.00127    | 24.52805 | 7.4E-133 |
| year6         | 0.037056 | 0.001329   | 27.88063 | 4.6E-171 |
| rural         | 0.002389 | 0.001435   | 1.664855 | 0.095942 |
| car           | 0.005539 | 0.001702   | 3.255262 | 0.001133 |
| psy           | 0.067605 | 0.001176   | 57.51074 | 0        |
| skc           | 0.011144 | 0.001481   | 7.524731 | 5.28E-14 |
| cns           | -0.02082 | 0.002555   | -8.14951 | 3.65E-16 |
| pul           | 0.026716 | 0.001631   | 16.37632 | 2.82E-60 |
| gi            | 0.032852 | 0.00161    | 20.40639 | 1.47E-92 |
| dia           | -0.03303 | 0.002828   | -11.6793 | 1.63E-31 |
| skn           | 0.011711 | 0.001979   | 5.917894 | 3.26E-09 |
| ren           | 0.001935 | 0.003229   | 0.59909  | 0.549113 |
| can           | -0.04105 | 0.003941   | -10.4174 | 2.06E-25 |
| dd            | 0.035293 | 0.011928   | 2.958811 | 0.003088 |
| gen           | 0.195374 | 0.001963   | 99.54504 | 0        |
| met           | -0.00714 | 0.002697   | -2.64852 | 0.008085 |
| eye           | -0.01835 | 0.004842   | -3.78982 | 0.000151 |
| cer           | -0.05914 | 0.009934   | -5.9531  | 2.63E-09 |
| hem           | 0.055826 | 0.004397   | 12.69733 | 6.12E-37 |
| agegroup25-29 | 0.020327 | 0.001607   | 12.64577 | 1.18E-36 |
| agegroup30-34 | -0.07184 | 0.00169    | -42.4983 | 0        |
| agegroup35+   | -0.27572 | 0.001349   | -204.329 | 0        |

|                            |          |          |          |          |
|----------------------------|----------|----------|----------|----------|
| medicaid:time              | -0.01172 | 0.001169 | -10.0222 | 1.22E-23 |
| medicaid:intervention      | -0.12114 | 0.00655  | -18.495  | 2.27E-76 |
| medicaid:time:intervention | 0.039291 | 0.001709 | 22.98549 | 6.5E-117 |

**eTable 4.** Raw Model Output From Primary Comparative Interrupted Time Series Model for Women Ages 18-24

|                            | Estimate | Std. Error | t value  | Pr(> t ) |
|----------------------------|----------|------------|----------|----------|
| (Intercept)                | 0.384957 | 0.002437   | 157.9316 | 0        |
| medicaid                   | 0.175797 | 0.006188   | 28.40717 | 1.6E-177 |
| year2                      | 0.016759 | 0.002382   | 7.034701 | 2E-12    |
| year3                      | 0.0281   | 0.003095   | 9.079124 | 1.09E-19 |
| year4                      | 0.044975 | 0.003247   | 13.85255 | 1.23E-43 |
| year5                      | 0.038168 | 0.003186   | 11.97927 | 4.56E-33 |
| year6                      | 0.042798 | 0.003394   | 12.61175 | 1.82E-36 |
| rural                      | 0.030409 | 0.002688   | 11.31443 | 1.11E-29 |
| car                        | 0.050475 | 0.005468   | 9.230954 | 2.68E-20 |
| psy                        | 0.130022 | 0.002435   | 53.38893 | 0        |
| skc                        | 0.048035 | 0.003656   | 13.13861 | 1.98E-39 |
| cns                        | -0.02496 | 0.006873   | -3.63081 | 0.000283 |
| pul                        | 0.079516 | 0.003524   | 22.56585 | 9.4E-113 |
| gi                         | 0.087392 | 0.003954   | 22.10086 | 3.1E-108 |
| dia                        | -0.01489 | 0.010196   | -1.46066 | 0.144108 |
| skn                        | 0.06014  | 0.004348   | 13.83272 | 1.62E-43 |
| ren                        | 0.017609 | 0.009761   | 1.80401  | 0.07123  |
| can                        | -0.017   | 0.018832   | -0.90259 | 0.366744 |
| dd                         | -0.05736 | 0.017116   | -3.35139 | 0.000804 |
| gen                        | 0.217151 | 0.003994   | 54.36545 | 0        |
| met                        | -0.00181 | 0.006893   | -0.26219 | 0.793173 |
| eye                        | 0.001118 | 0.016645   | 0.067164 | 0.946451 |
| cer                        | -0.09259 | 0.034866   | -2.65555 | 0.007918 |
| hem                        | 0.091849 | 0.010394   | 8.836915 | 9.84E-19 |
| medicaid:time              | -0.04768 | 0.002559   | -18.6342 | 1.7E-77  |
| medicaid:intervention      | -0.2204  | 0.014029   | -15.7107 | 1.28E-55 |
| medicaid:time:intervention | 0.064166 | 0.003698   | 17.34932 | 2E-67    |

**eTable 5.** Raw Model Output From Primary Comparative Interrupted Time Series Model for Women Ages 25-29

|                            | Estimate | Std. Error | t value  | Pr(> t ) |
|----------------------------|----------|------------|----------|----------|
| (Intercept)                | 0.468231 | 0.003222   | 145.303  | 0        |
| medicaid                   | -0.01246 | 0.008393   | -1.48472 | 0.137619 |
| year2                      | 0.011801 | 0.003427   | 3.443598 | 0.000574 |
| year3                      | 0.007833 | 0.004405   | 1.778205 | 0.07537  |
| year4                      | 0.005021 | 0.004421   | 1.135807 | 0.256037 |
| year5                      | -0.00869 | 0.004198   | -2.07023 | 0.03843  |
| year6                      | -0.01331 | 0.004377   | -3.04011 | 0.002365 |
| rural                      | 0.011146 | 0.003397   | 3.281087 | 0.001034 |
| car                        | 0.046164 | 0.005636   | 8.190381 | 2.6E-16  |
| psy                        | 0.07055  | 0.002941   | 23.98664 | 3.8E-127 |
| skc                        | 0.028964 | 0.004405   | 6.575953 | 4.83E-11 |
| cns                        | -0.0365  | 0.007664   | -4.76257 | 1.91E-06 |
| pul                        | 0.035319 | 0.004426   | 7.980366 | 1.46E-15 |
| gi                         | 0.052558 | 0.004413   | 11.91021 | 1.05E-32 |
| dia                        | -0.0007  | 0.010309   | -0.06786 | 0.945898 |
| skn                        | 0.007261 | 0.005514   | 1.316981 | 0.187845 |
| ren                        | 0.020865 | 0.010088   | 2.068203 | 0.038621 |
| can                        | 0.009227 | 0.016749   | 0.550919 | 0.581689 |
| dd                         | -0.02335 | 0.022538   | -1.036   | 0.300202 |
| gen                        | 0.171664 | 0.004589   | 37.40386 | 3.4E-306 |
| met                        | -0.00824 | 0.00792    | -1.04019 | 0.298251 |
| eye                        | -0.01037 | 0.019692   | -0.52653 | 0.59852  |
| cer                        | -0.0587  | 0.033784   | -1.73755 | 0.08229  |
| hem                        | 0.086844 | 0.011598   | 7.487872 | 7E-14    |
| medicaid:time              | 0.001447 | 0.003531   | 0.409728 | 0.682005 |
| medicaid:intervention      | -0.09794 | 0.018921   | -5.17637 | 2.26E-07 |
| medicaid:time:intervention | 0.031989 | 0.005      | 6.397846 | 1.58E-10 |

**eTable 6.** Raw Model Output From Primary Comparative Interrupted Time Series Model for Women Ages 30-34

|                            | Estimate | Std. Error | t value  | Pr(> t ) |
|----------------------------|----------|------------|----------|----------|
| (Intercept)                | 0.379495 | 0.002918   | 130.0753 | 0        |
| medicaid                   | -0.06592 | 0.007861   | -8.38501 | 5.07E-17 |
| year2                      | 0.019048 | 0.003003   | 6.343428 | 2.25E-10 |
| year3                      | 0.026731 | 0.00384    | 6.960861 | 3.38E-12 |
| year4                      | 0.018128 | 0.003953   | 4.586235 | 4.51E-06 |
| year5                      | 0.015094 | 0.003853   | 3.917412 | 8.95E-05 |
| year6                      | 0.013548 | 0.004028   | 3.363599 | 0.000769 |
| rural                      | -0.00797 | 0.003542   | -2.25047 | 0.024419 |
| car                        | 0.027919 | 0.004871   | 5.731359 | 9.96E-09 |
| psy                        | 0.050425 | 0.002887   | 17.46909 | 2.46E-68 |
| skc                        | 0.020261 | 0.003992   | 5.074899 | 3.88E-07 |
| cns                        | -0.01477 | 0.006638   | -2.22423 | 0.026133 |
| pul                        | 0.020236 | 0.004264   | 4.746066 | 2.07E-06 |
| gi                         | 0.040505 | 0.004212   | 9.617119 | 6.77E-22 |
| dia                        | 0.004303 | 0.008811   | 0.488422 | 0.625251 |
| skn                        | -0.00103 | 0.005331   | -0.19324 | 0.846768 |
| ren                        | 0.020709 | 0.008934   | 2.318027 | 0.020448 |
| can                        | 0.007154 | 0.013426   | 0.532817 | 0.59416  |
| dd                         | 0.028318 | 0.026421   | 1.071778 | 0.28382  |
| gen                        | 0.189299 | 0.004757   | 39.79183 | 0        |
| met                        | -0.01422 | 0.007295   | -1.94879 | 0.051321 |
| eye                        | 0.011613 | 0.016911   | 0.686692 | 0.492277 |
| cer                        | -0.04256 | 0.029595   | -1.43818 | 0.150383 |
| hem                        | 0.10387  | 0.010965   | 9.473257 | 2.71E-21 |
| medicaid:time              | 0.004297 | 0.003255   | 1.320221 | 0.186761 |
| medicaid:intervention      | -0.0997  | 0.018006   | -5.53726 | 3.07E-08 |
| medicaid:time:intervention | 0.037129 | 0.004724   | 7.85932  | 3.86E-15 |



**eTable 7.** Raw Model Output From Primary Comparative Interrupted Time Series Model for Women Ages 35-50

|                            | Estimate | Std. Error | t value  | Pr(> t ) |
|----------------------------|----------|------------|----------|----------|
| (Intercept)                | 0.166058 | 0.001223   | 135.8311 | 0        |
| medicaid                   | -0.03138 | 0.003818   | -8.22128 | 2.01E-16 |
| year2                      | 0.014824 | 0.001127   | 13.15813 | 1.53E-39 |
| year3                      | 0.024384 | 0.00141    | 17.29463 | 5.16E-67 |
| year4                      | 0.031077 | 0.00151    | 20.5798  | 4.16E-94 |
| year5                      | 0.04332  | 0.001556   | 27.83194 | 1.8E-170 |
| year6                      | 0.053667 | 0.001628   | 32.95769 | 3.3E-238 |
| rural                      | -0.01539 | 0.002049   | -7.50895 | 5.96E-14 |
| car                        | 0.001067 | 0.001981   | 0.538848 | 0.589992 |
| psy                        | 0.043678 | 0.001641   | 26.62128 | 3.9E-156 |
| skc                        | 0.00095  | 0.00185    | 0.513223 | 0.607796 |
| cns                        | -0.00983 | 0.00306    | -3.21359 | 0.001311 |
| pul                        | 0.005069 | 0.002156   | 2.350589 | 0.018744 |
| gi                         | 0.012861 | 0.002054   | 6.261449 | 3.81E-10 |
| dia                        | -0.03106 | 0.003115   | -9.96951 | 2.07E-23 |
| skn                        | -0.00411 | 0.002579   | -1.59393 | 0.110951 |
| ren                        | -0.0037  | 0.003739   | -0.98987 | 0.322235 |
| can                        | -0.04775 | 0.004125   | -11.576  | 5.46E-31 |
| dd                         | 0.152126 | 0.024455   | 6.220747 | 4.95E-10 |
| gen                        | 0.188935 | 0.002958   | 63.86721 | 0        |
| met                        | -0.00599 | 0.003341   | -1.7933  | 0.072924 |
| eye                        | -0.01832 | 0.005294   | -3.46057 | 0.000539 |
| cer                        | -0.04313 | 0.010711   | -4.02712 | 5.65E-05 |
| hem                        | 0.013927 | 0.00577    | 2.413781 | 0.015788 |
| medicaid:time              | 0.003328 | 0.001519   | 2.190461 | 0.028491 |
| medicaid:intervention      | -0.08704 | 0.009242   | -9.41769 | 4.61E-21 |
| medicaid:time:intervention | 0.030997 | 0.002359   | 13.13974 | 1.95E-39 |

**eFigure.** CONSORT Diagram of Sample Selection

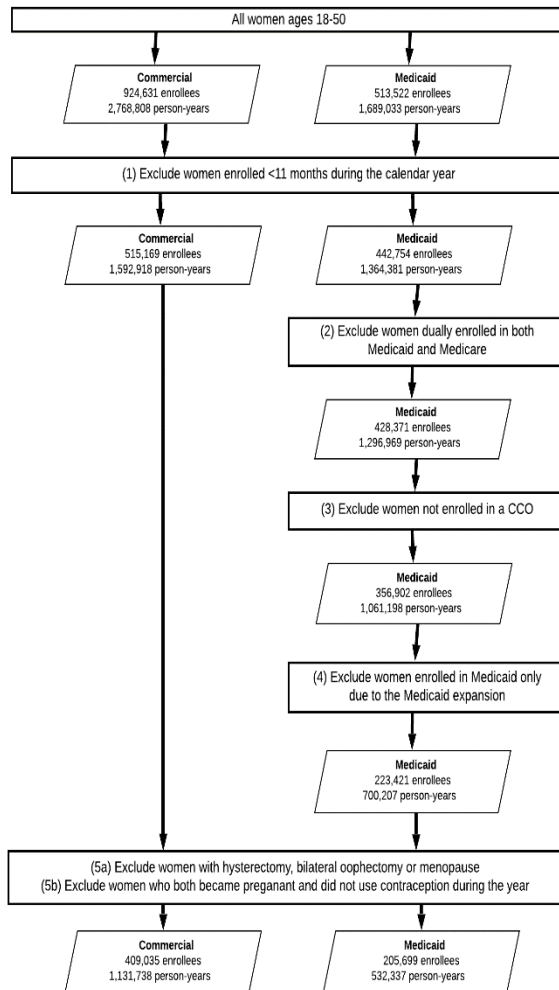

Supplement: jamanetwopen-3-e2012540-s001.pdf [file jamanetwopen-3-e2012540-s001.pdf]
